# Supplementary material for: Intratonsillar detection of 27 distinct viruses: A cross‐sectional study
Source: PubMed Central journal article supplement (PMC7689766; doi:10.1002/jmv.26245), 2020-07-14
Supplement: JMV-92-3830-s001.pdf [file JMV-92-3830-s001.pdf]

**Supplementary Table A.** Respiratory symptoms within two weeks prior to surgery in relation to surgical indications and age groups

|              | <b>Total</b> | <b>Asymptomatic</b> | <b>Sore throat</b> | <b>Other respiratory symptoms</b> | <b>Sore throat and other respiratory symptoms</b> |
|--------------|--------------|---------------------|--------------------|-----------------------------------|---------------------------------------------------|
| <b>TOTAL</b> | <b>181</b>   | <b>87</b>           | <b>22</b>          | <b>39</b>                         | <b>33</b>                                         |
| <b>TH</b>    | <b>25</b>    | <b>21</b>           | <b>0</b>           | <b>4</b>                          | <b>0</b>                                          |
| < 16 years   | 22           | 18                  | 0                  | 4                                 | 0                                                 |
| 16–30 years  | 1            | 1                   | 0                  | 0                                 | 0                                                 |
| > 30 years   | 2            | 2                   | 0                  | 0                                 | 0                                                 |
| <b>CT</b>    | <b>49</b>    | <b>17</b>           | <b>11</b>          | <b>8</b>                          | <b>13</b>                                         |
| < 16 years   | 0            | 0                   | 0                  | 0                                 | 0                                                 |
| 16–30 years  | 24           | 9                   | 2                  | 5                                 | 8                                                 |
| > 30 years   | 25           | 8                   | 9                  | 3                                 | 5                                                 |
| <b>RT</b>    | <b>27</b>    | <b>15</b>           | <b>2</b>           | <b>7</b>                          | <b>3</b>                                          |
| < 16 years   | 2            | 1                   | 0                  | 1                                 | 0                                                 |
| 16–30 years  | 21           | 11                  | 2                  | 5                                 | 3                                                 |
| > 30 years   | 4            | 3                   | 0                  | 1                                 | 0                                                 |
| <b>PA</b>    | <b>11</b>    | <b>6</b>            | <b>1</b>           | <b>2</b>                          | <b>2</b>                                          |
| < 16 years   | 0            | 0                   | 0                  | 0                                 | 0                                                 |
| 16–30 years  | 7            | 3                   | 1                  | 2                                 | 1                                                 |
| > 30 years   | 4            | 3                   | 0                  | 0                                 | 1                                                 |
| <b>TH+CT</b> | <b>16</b>    | <b>6</b>            | <b>4</b>           | <b>2</b>                          | <b>4</b>                                          |
| < 16 years   | 5            | 1                   | 2                  | 1                                 | 1                                                 |
| 16–30 years  | 9            | 4                   | 2                  | 1                                 | 2                                                 |
| > 30 years   | 2            | 1                   | 0                  | 0                                 | 1                                                 |
| <b>CT+RT</b> | <b>35</b>    | <b>14</b>           | <b>2</b>           | <b>12</b>                         | <b>7</b>                                          |
| < 16 years   | 4            | 2                   | 1                  | 1                                 | 0                                                 |
| 16–30 years  | 22           | 8                   | 1                  | 9                                 | 4                                                 |
| > 30 years   | 9            | 4                   | 0                  | 2                                 | 3                                                 |
| <b>RT+PA</b> | <b>6</b>     | <b>2</b>            | <b>0</b>           | <b>2</b>                          | <b>2</b>                                          |
| < 16 years   | 0            | 0                   | 0                  | 0                                 | 0                                                 |
| 16–30 years  | 3            | 2                   | 0                  | 0                                 | 1                                                 |
| > 30 years   | 3            | 0                   | 0                  | 2                                 | 1                                                 |
| <b>TH+RT</b> | <b>8</b>     | <b>5</b>            | <b>2</b>           | <b>1</b>                          | <b>0</b>                                          |
| < 16 years   | 4            | 2                   | 2                  | 0                                 | 0                                                 |
| 16–30 years  | 3            | 2                   | 0                  | 1                                 | 0                                                 |
| > 30 years   | 1            | 1                   | 0                  | 0                                 | 0                                                 |
| <b>CT+PA</b> | <b>4</b>     | <b>1</b>            | <b>0</b>           | <b>1</b>                          | <b>2</b>                                          |
| < 16 years   | 0            | 0                   | 0                  | 0                                 | 0                                                 |
| 16–30 years  | 3            | 1                   | 0                  | 1                                 | 1                                                 |
| > 30 years   | 1            | 0                   | 0                  | 0                                 | 1                                                 |

TH=tonsillar hypertrophy, CT=chronic tonsillitis, RT=recurrent tonsillitis, PA=history of peritonsillar abscess

**Supplementary Table B.** Respiratory symptoms two weeks prior to surgery and surgical indications in relation to gender, atopic diseases and smoking

|                                            | <b>Total</b> | <b>Male</b> | <b>Female</b> | <b>Allergic rhinitis</b> | <b>Asthma</b> | <b>Atopic dermatitis</b> | <b>Current smoker</b> |
|--------------------------------------------|--------------|-------------|---------------|--------------------------|---------------|--------------------------|-----------------------|
| <b>TOTAL</b>                               | <b>181</b>   | <b>79</b>   | <b>102</b>    | <b>70</b>                | <b>23</b>     | <b>31</b>                | <b>39</b>             |
| Asymptomatic                               | 87           | 44          | 43            | 34                       | 10            | 17                       | 14                    |
| Sore throat                                | 22           | 4           | 18            | 10                       | 4             | 3                        | 4                     |
| Other respiratory symptoms                 | 39           | 17          | 22            | 14                       | 3             | 5                        | 14                    |
| Sore throat and other respiratory symptoms | 33           | 14          | 19            | 12                       | 6             | 6                        | 7                     |
| TH                                         | 25           | 16          | 9             | 5                        | 2             | 2                        | 0                     |
| CT                                         | 49           | 14          | 35            | 29                       | 8             | 9                        | 6                     |
| RT                                         | 27           | 7           | 20            | 3                        | 1             | 4                        | 8                     |
| PA                                         | 11           | 8           | 3             | 4                        | 1             | 0                        | 3                     |
| TH+CT                                      | 16           | 10          | 6             | 7                        | 2             | 4                        | 3                     |
| CT+RT                                      | 35           | 13          | 22            | 14                       | 6             | 9                        | 12                    |
| RT+PA                                      | 6            | 5           | 1             | 4                        | 1             | 1                        | 3                     |
| TH+RT                                      | 8            | 4           | 4             | 2                        | 2             | 1                        | 3                     |
| CT+PA                                      | 4            | 2           | 2             | 2                        | 0             | 1                        | 1                     |

TH=tonsillar hypertrophy, CT=chronic tonsillitis, RT=recurrent tonsillitis, PA=history of peritonsillar abscess

**Supplementary table C. Viral prevalence in relation to atopic diseases and smoking**

|                     | <b>Total</b> | <b>Allergic Rhinitis</b> | <b>Asthma</b> | <b>Atopic Dermatitis</b> | <b>Current smoker</b> |
|---------------------|--------------|--------------------------|---------------|--------------------------|-----------------------|
| <b>TOTAL</b>        | <b>181</b>   | <b>70</b>                | <b>23</b>     | <b>31</b>                | <b>39</b>             |
| No viruses          | 15           | 7                        | 2             | 4                        | 2                     |
| Single infection    | 51           | 17                       | 6             | 9                        | 14                    |
| Dual infection      | 76           | 34                       | 12            | 9                        | 20                    |
| Triple infection    | 27           | 9                        | 3             | 7                        | 2                     |
| Quadruple infection | 11           | 3                        | 0             | 2                        | 1                     |
| Quintuple infection | 1            | 0                        | 0             | 0                        | 0                     |
| AdV                 | 6            | 1                        | 0             | 3                        | 0                     |
| HBoV                | 7            | 1                        | 0             | 0                        | 1                     |
| EV                  | 32           | 9                        | 4             | 7                        | 2                     |
| RSV                 | 5            | 4                        | 1             | 1                        | 0                     |
| HRV                 | 4            | 3                        | 1             | 2                        | 0                     |
| FluA                | 2            | 2                        | 1             | 0                        | 0                     |
| FluB                | 1            | 0                        | 0             | 1                        | 0                     |
| HSV1                | 1            | 1                        | 0             | 0                        | 0                     |
| CMV                 | 1            | 1                        | 0             | 0                        | 0                     |
| EBV                 | 130          | 50                       | 18            | 21                       | 31                    |
| HHV6A               | 2            | 1                        | 0             | 0                        | 0                     |
| HHV6B               | 29           | 7                        | 3             | 5                        | 8                     |
| HHV7                | 97           | 40                       | 10            | 14                       | 18                    |
| Parvo               | 13           | 4                        | 1             | 2                        | 4                     |
| BKPyV               | 2            | 0                        | 0             | 0                        | 0                     |

AdV=adenovirus, HBoV=human bocavirus (1/2/3/4), EV=enterovirus, RSV=respiratory syncytial virus, RV=rhinovirus (A/B/C), FluA/B=influenza A/B virus, HSV1=herpes simplex virus 1, CMV=human cytomegalovirus, EBV=Epstein-Barr virus, HHV6A/6B/7=human herpesvirus 6A/6B/7, Parvo=parvovirus B19, BKPyV=polyoma BK virus

**Supplementary table D.** Intratonsillar viral prevalence in relation to surgical indications and age groups

|                                            | Total                       | No<br>viruses            | AdV                     | HBoV                    | EV                        | RSV                     | RV                      | FluA                    | FluB                    | HSV1                    | CMV                     | EBV                        | HHV<br>6A               | HHV<br>6B                 | HHV7                      | Parvo                    | BKPyV                   |
|--------------------------------------------|-----------------------------|--------------------------|-------------------------|-------------------------|---------------------------|-------------------------|-------------------------|-------------------------|-------------------------|-------------------------|-------------------------|----------------------------|-------------------------|---------------------------|---------------------------|--------------------------|-------------------------|
| <b>TOTAL</b><br>(number and<br>percentage) | <b>181</b><br><b>100.0%</b> | <b>15</b><br><b>8.3%</b> | <b>6</b><br><b>3.3%</b> | <b>7</b><br><b>3.9%</b> | <b>32</b><br><b>17.7%</b> | <b>5</b><br><b>2.8%</b> | <b>4</b><br><b>2.2%</b> | <b>2</b><br><b>1.1%</b> | <b>1</b><br><b>0.6%</b> | <b>1</b><br><b>0.6%</b> | <b>1</b><br><b>0.6%</b> | <b>130</b><br><b>71.8%</b> | <b>2</b><br><b>1.1%</b> | <b>29</b><br><b>16.0%</b> | <b>97</b><br><b>53.5%</b> | <b>13</b><br><b>7.2%</b> | <b>2</b><br><b>1.1%</b> |
| <b>TH</b>                                  | <b>25</b>                   | <b>1</b>                 | <b>2</b>                | <b>4</b>                | <b>9</b>                  | <b>1</b>                | <b>1</b>                | <b>0</b>                | <b>0</b>                | <b>0</b>                | <b>0</b>                | <b>16</b>                  | <b>1</b>                | <b>5</b>                  | <b>14</b>                 | <b>2</b>                 | <b>2</b>                |
| < 16 years                                 | 22                          | 1                        | 2                       | 4                       | 9                         | 0                       | 1                       | 0                       | 0                       | 0                       | 0                       | 13                         | 1                       | 5                         | 11                        | 2                        | 2                       |
| 16–30 years                                | 1                           | 0                        | 0                       | 0                       | 0                         | 0                       | 0                       | 0                       | 0                       | 0                       | 0                       | 1                          | 0                       | 0                         | 1                         | 0                        | 0                       |
| > 30 years                                 | 2                           | 0                        | 0                       | 0                       | 0                         | 1                       | 0                       | 0                       | 0                       | 0                       | 0                       | 2                          | 0                       | 0                         | 2                         | 0                        | 0                       |
| <b>CT</b>                                  | <b>49</b>                   | <b>8</b>                 | <b>0</b>                | <b>1</b>                | <b>5</b>                  | <b>1</b>                | <b>1</b>                | <b>1</b>                | <b>0</b>                | <b>0</b>                | <b>1</b>                | <b>34</b>                  | <b>1</b>                | <b>5</b>                  | <b>28</b>                 | <b>1</b>                 | <b>0</b>                |
| < 16 years                                 | 0                           | 0                        | 0                       | 0                       | 0                         | 0                       | 0                       | 0                       | 0                       | 0                       | 0                       | 0                          | 0                       | 0                         | 0                         | 0                        | 0                       |
| 16–30 years                                | 24                          | 4                        | 0                       | 0                       | 0                         | 1                       | 0                       | 1                       | 0                       | 0                       | 0                       | 16                         | 0                       | 2                         | 14                        | 0                        | 0                       |
| > 30 years                                 | 25                          | 4                        | 0                       | 1                       | 5                         | 0                       | 1                       | 0                       | 0                       | 0                       | 1                       | 18                         | 1                       | 3                         | 14                        | 1                        | 0                       |
| <b>RT</b>                                  | <b>27</b>                   | <b>1</b>                 | <b>2</b>                | <b>1</b>                | <b>2</b>                  | <b>0</b>                | <b>0</b>                | <b>1</b>                | <b>1</b>                | <b>0</b>                | <b>0</b>                | <b>20</b>                  | <b>0</b>                | <b>6</b>                  | <b>17</b>                 | <b>1</b>                 | <b>0</b>                |
| < 16 years                                 | 2                           | 0                        | 0                       | 0                       | 0                         | 0                       | 0                       | 0                       | 1                       | 0                       | 0                       | 2                          | 0                       | 1                         | 2                         | 0                        | 0                       |
| 16–30 years                                | 21                          | 1                        | 2                       | 1                       | 2                         | 0                       | 0                       | 1                       | 0                       | 0                       | 0                       | 16                         | 0                       | 5                         | 12                        | 1                        | 0                       |
| > 30 years                                 | 4                           | 0                        | 0                       | 0                       | 0                         | 0                       | 0                       | 0                       | 0                       | 0                       | 0                       | 2                          | 0                       | 0                         | 3                         | 0                        | 0                       |
| <b>PA</b>                                  | <b>11</b>                   | <b>0</b>                 | <b>0</b>                | <b>0</b>                | <b>1</b>                  | <b>0</b>                | <b>0</b>                | <b>0</b>                | <b>0</b>                | <b>0</b>                | <b>0</b>                | <b>11</b>                  | <b>0</b>                | <b>2</b>                  | <b>4</b>                  | <b>0</b>                 | <b>0</b>                |
| < 16 years                                 | 0                           | 0                        | 0                       | 0                       | 0                         | 0                       | 0                       | 0                       | 0                       | 0                       | 0                       | 0                          | 0                       | 0                         | 0                         | 0                        | 0                       |
| 16–30 years                                | 7                           | 0                        | 0                       | 0                       | 1                         | 0                       | 0                       | 0                       | 0                       | 0                       | 0                       | 7                          | 0                       | 2                         | 3                         | 0                        | 0                       |
| > 30 years                                 | 4                           | 0                        | 0                       | 0                       | 0                         | 0                       | 0                       | 0                       | 0                       | 0                       | 0                       | 4                          | 0                       | 0                         | 1                         | 0                        | 0                       |
| <b>TH+CT</b>                               | <b>16</b>                   | <b>2</b>                 | <b>0</b>                | <b>1</b>                | <b>4</b>                  | <b>0</b>                | <b>0</b>                | <b>0</b>                | <b>0</b>                | <b>0</b>                | <b>0</b>                | <b>10</b>                  | <b>0</b>                | <b>1</b>                  | <b>9</b>                  | <b>3</b>                 | <b>0</b>                |
| < 16 years                                 | 5                           | 1                        | 0                       | 0                       | 3                         | 0                       | 0                       | 0                       | 0                       | 0                       | 0                       | 3                          | 0                       | 1                         | 1                         | 1                        | 0                       |
| 16–30 years                                | 9                           | 1                        | 0                       | 0                       | 1                         | 0                       | 0                       | 0                       | 0                       | 0                       | 0                       | 6                          | 0                       | 0                         | 6                         | 2                        | 0                       |
| > 30 years                                 | 2                           | 0                        | 0                       | 1                       | 0                         | 0                       | 0                       | 0                       | 0                       | 0                       | 0                       | 1                          | 0                       | 0                         | 2                         | 0                        | 0                       |
| <b>CT+RT</b>                               | <b>35</b>                   | <b>1</b>                 | <b>2</b>                | <b>0</b>                | <b>9</b>                  | <b>3</b>                | <b>1</b>                | <b>0</b>                | <b>0</b>                | <b>1</b>                | <b>0</b>                | <b>25</b>                  | <b>0</b>                | <b>4</b>                  | <b>14</b>                 | <b>6</b>                 | <b>0</b>                |
| < 16 years                                 | 4                           | 0                        | 1                       | 0                       | 2                         | 0                       | 1                       | 0                       | 0                       | 0                       | 0                       | 2                          | 0                       | 0                         | 2                         | 0                        | 0                       |
| 16–30 years                                | 22                          | 1                        | 1                       | 0                       | 4                         | 0                       | 0                       | 0                       | 0                       | 1                       | 0                       | 15                         | 0                       | 4                         | 9                         | 6                        | 0                       |
| > 30 years                                 | 9                           | 0                        | 0                       | 0                       | 3                         | 3                       | 0                       | 0                       | 0                       | 0                       | 0                       | 8                          | 0                       | 0                         | 3                         | 0                        | 0                       |
| <b>RT+PA</b>                               | <b>6</b>                    | <b>0</b>                 | <b>0</b>                | <b>0</b>                | <b>1</b>                  | <b>0</b>                | <b>1</b>                | <b>0</b>                | <b>0</b>                | <b>0</b>                | <b>0</b>                | <b>6</b>                   | <b>0</b>                | <b>2</b>                  | <b>4</b>                  | <b>0</b>                 | <b>0</b>                |
| < 16 years                                 | 0                           | 0                        | 0                       | 0                       | 0                         | 0                       | 0                       | 0                       | 0                       | 0                       | 0                       | 0                          | 0                       | 0                         | 0                         | 0                        | 0                       |
| 16–30 years                                | 3                           | 0                        | 0                       | 0                       | 1                         | 0                       | 1                       | 0                       | 0                       | 0                       | 0                       | 3                          | 0                       | 0                         | 2                         | 0                        | 0                       |
| > 30 years                                 | 3                           | 0                        | 0                       | 0                       | 0                         | 0                       | 0                       | 0                       | 0                       | 0                       | 0                       | 3                          | 0                       | 2                         | 2                         | 0                        | 0                       |
| <b>TH+RT</b>                               | <b>8</b>                    | <b>1</b>                 | <b>0</b>                | <b>0</b>                | <b>1</b>                  | <b>0</b>                | <b>0</b>                | <b>0</b>                | <b>0</b>                | <b>0</b>                | <b>0</b>                | <b>6</b>                   | <b>0</b>                | <b>3</b>                  | <b>4</b>                  | <b>0</b>                 | <b>0</b>                |
| < 16 years                                 | 4                           | 0                        | 0                       | 0                       | 1                         | 0                       | 0                       | 0                       | 0                       | 0                       | 0                       | 4                          | 0                       | 1                         | 2                         | 0                        | 0                       |
| 16–30 years                                | 3                           | 1                        | 0                       | 0                       | 0                         | 0                       | 0                       | 0                       | 0                       | 0                       | 0                       | 1                          | 0                       | 1                         | 1                         | 0                        | 0                       |
| > 30 years                                 | 1                           | 0                        | 0                       | 0                       | 0                         | 0                       | 0                       | 0                       | 0                       | 0                       | 0                       | 1                          | 0                       | 1                         | 1                         | 0                        | 0                       |
| <b>CT+PA</b>                               | <b>4</b>                    | <b>1</b>                 | <b>0</b>                | <b>0</b>                | <b>0</b>                  | <b>0</b>                | <b>0</b>                | <b>0</b>                | <b>0</b>                | <b>0</b>                | <b>0</b>                | <b>2</b>                   | <b>0</b>                | <b>1</b>                  | <b>3</b>                  | <b>0</b>                 | <b>0</b>                |
| < 16 years                                 | 0                           | 0                        | 0                       | 0                       | 0                         | 0                       | 0                       | 0                       | 0                       | 0                       | 0                       | 0                          | 0                       | 0                         | 0                         | 0                        | 0                       |
| 16–30 years                                | 3                           | 1                        | 0                       | 0                       | 0                         | 0                       | 0                       | 0                       | 0                       | 0                       | 0                       | 2                          | 0                       | 1                         | 2                         | 0                        | 0                       |
| > 30 years                                 | 1                           | 0                        | 0                       | 0                       | 0                         | 0                       | 0                       | 0                       | 0                       | 0                       | 0                       | 0                          | 0                       | 0                         | 1                         | 0                        | 0                       |

TH=tonsillar hypertrophy, CT=chronic tonsillitis, RT=recurrent tonsillitis, PA=history of peritonsillar abscess. AdV=adenovirus, HBoV=human bocavirus (1/2/3/4), EV=enterovirus, RSV=respiratory syncytial virus, RV=rhinovirus (A/B/C), FluA/B=influenza A/B virus, HSV1=herpes simplex virus 1, CMV=human cytomegalovirus, EBV=Epstein-Barr virus, HHV6A/6B/7=human herpesvirus 6A/6B/7, Parvo=parvovirus B19, BKPyV=polyoma BK virus
